# Supplementary material for: Effects of tapering tumor necrosis factor inhibitor on the achievement of inactive disease in patients with axial spondyloarthritis: a nationwide cohort study
Source: Arthritis Res Ther. 2019 Jul 4;21:163. doi: 10.1186/s13075-019-1943-6 (PMC6611048; doi:10.1186/s13075-019-1943-6)
Supplement: Supplementary file 1 — Figure S1. Flow chart of inclusion. Figure S2. Dynamic changes in dose quotient (DQ) of TNFi in included patients during the follow-up (time level). Figure S3. Proportion of 1-year intervals achieving (A) ASDAS-low disease activity, (B) ASAS20, (C) ASAS40, (D) BASDAI < 4, and (E) CRP < 0.5 mg/dL. Table S1. Effect of tapering TNFi on the achievement of various outcomes in 1-year intervals. Table S2. Effect of tapering DQ on maintaining ASDAS-ID in subsequent 1-year intervals in the subgroup of patients who showed ASDAS-low disease activity (1.3 ≤ ASDAS-CRP < 2.1) at 1-year follow-up (n = 254). Table S3. Multivariable longitudinal model where all clinically relevant factors were included as covariates. Table S4. Effect of tapered DQ on the achievement of consecutive ASDAS-ID in the subgroup of patients who completed 3-year follow-up. (DOCX 1150 kb) [file 13075_2019_1943_MOESM1_ESM.docx]

**Supplementary figure S1.** Flow chart of inclusion

**Supplementary figure S2.** Dynamic changes in dose quotient (DQ) of TNFi in included patients during the follow up (time level)

**Supplementary figure S3.** Proportion of one-year intervals achieving (A) ASDAS-low disease activity, (B) ASAS20, (C) ASAS40, (D) BASDAI < 4, and (E) CRP < 0.5mg/dL
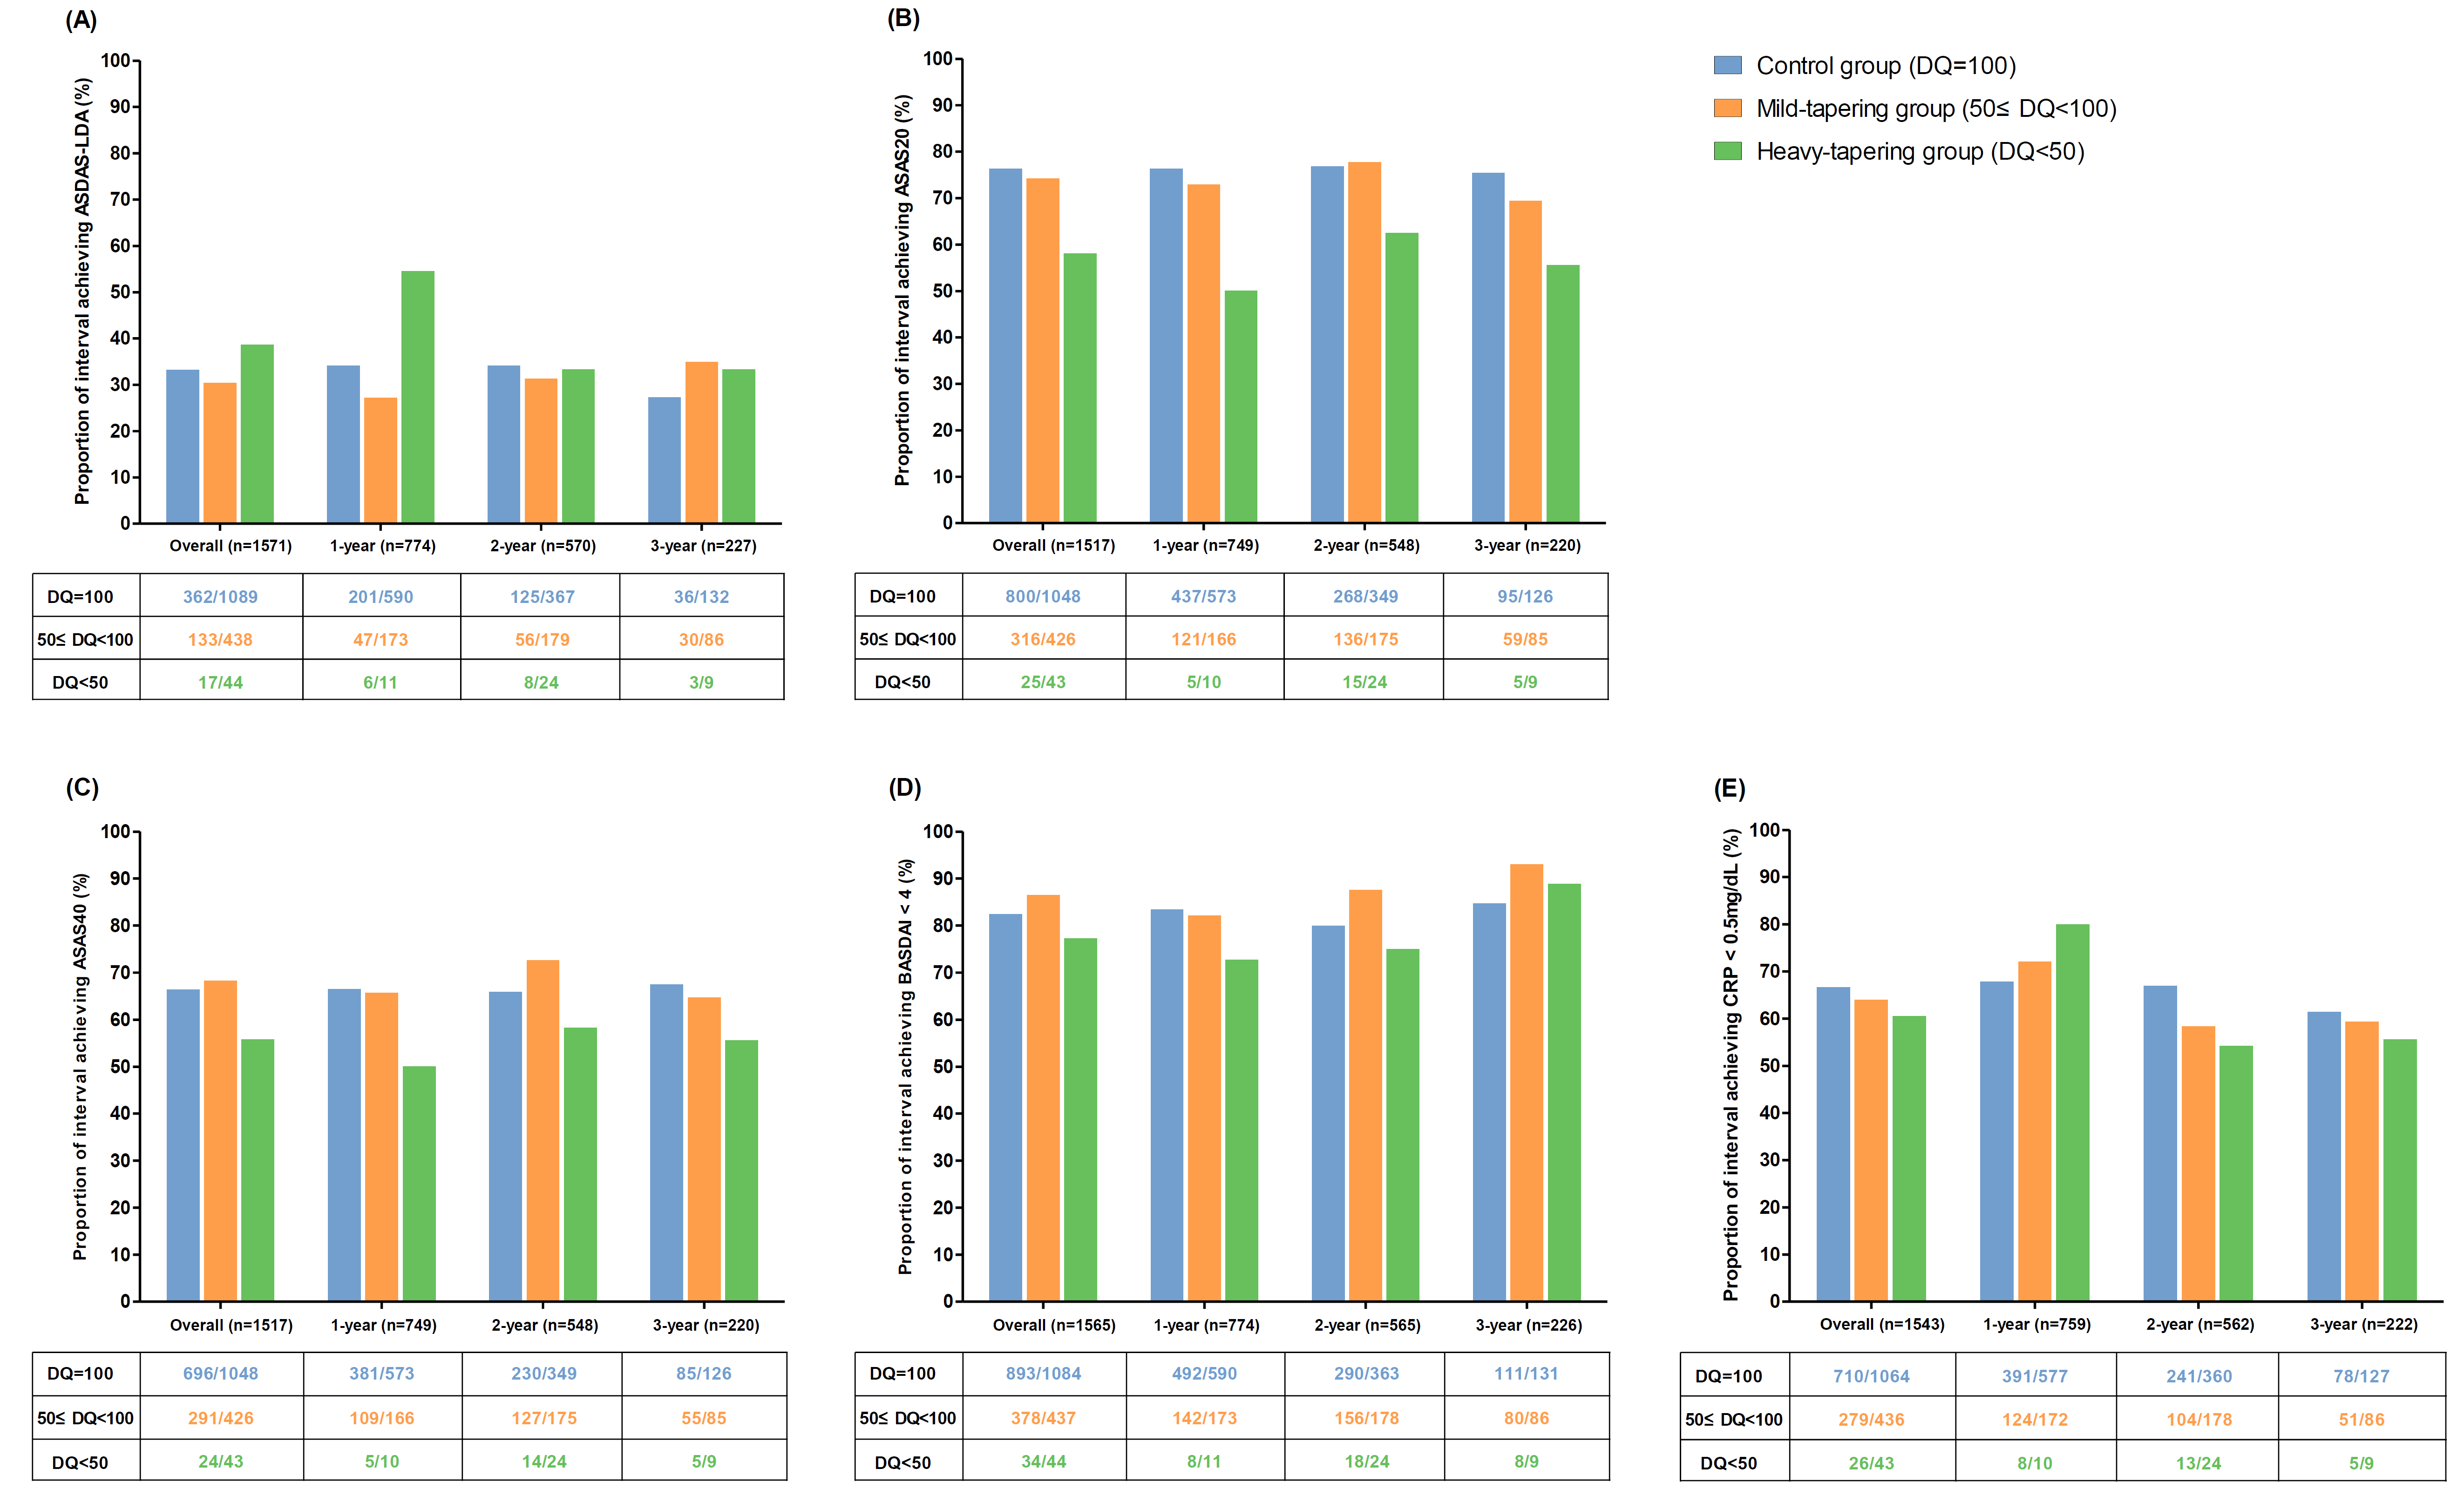


**Supplementary table S1.** Effect of tapering TNFi on the achievement of various outcomes in one-year intervals

| Outcome variable | Univariable model  OR (95% CI) | Multivariable model*  OR (95% CI) |
| --- | --- | --- |
| ASDAS-LDA (n = 776) |  |  |
| Control group (DQ = 100) | Reference | Reference |
| Mild-tapering group (50 ≤ DQ < 100) | 0.91 (0.72–1.16) | 0.93 (0.73–1.19) † |
| Heavy-tapering group (DQ < 50) | 1.39 (0.77–2.53) | 1.46 (0.81–2.65) † |
| ASAS20 response (n = 754) |  |  |
| Control group (DQ = 100) | Reference | Reference |
| Mild-tapering group (50 ≤ DQ < 100) | 0.92 (0.72–1.16) | 0.86 (0.66–1.13) ‡ |
| Heavy-tapering group (DQ < 50) | 0.45 (0.23–0.89) | 0.31 (0.12–0.78) ‡ |
| ASAS40 response (n = 754) |  |  |
| Control group (DQ = 100) | Reference | Reference |
| Mild-tapering group (50 ≤ DQ < 100) | 1.17 (0.93–1.48) | 1.07 (0.83–1.40) ⁋ |
| Heavy-tapering group (DQ < 50) | 0.61 (0.31–1.20) | 0.44 (0.17–1.14) ⁋ |
| BASDAI < 4 (n = 748) |  |  |
| Control group (DQ = 100) | Reference | Reference |
| Mild-tapering group (50 ≤ DQ < 100) | 1.48 (1.09–2.02) | 1.27 (0.90–1.80)∮ |
| Heavy-tapering group (DQ < 50) | 0.66 (0.33–1.31) | 0.45 (0.21–0.99)∮ |
| CRP < 0.5mg/dL (n = 753) |  |  |
| Control group (DQ = 100) | Reference | Reference |
| Mild-tapering group (50 ≤ DQ < 100) | 0.96 (0.79–1.15) | 1.02 (0.83–1.25) ∫ |
| Heavy-tapering group (DQ < 50) | 0.60 (0.36–1.03) | 0.68 (0.39–1.17) ∫ |

ASDAS, Ankylosing Spondylitis Disease Activity Score; BASDAI, Bath Ankylosing Spondylitis Activity Index; CI, confidence interval; DQ, dose quotient; HLA, human leukocyte antigen; NSAID, nonsteroidal anti-inflammatory drug; OR, odds ratio.

*, The model was adjusted for baseline and longitudinal factors with a relevant association (P < 0.2) with the outcome in the univariable model.

†, was adjusted for concomitant NSAID and sulfasalazine use.

‡, was adjusted for age, disease duration, TNFi naïve, HLA-B27, baseline ASDAS-CRP, ASDAS-CRP t-1 and concomitant NSAID use.

⁋, was adjusted for age, disease duration, obesity, definite sacroiliitis, TNFi naïve, baseline ASDAS-CRP, ASDAS-CRP t-1 and concomitant NSAID use.

∮, was adjusted for age, sex, obesity, HLA-B27, TNFi naïve, follow-up year, baseline BASDI and CRP, BASDAIt-1, and concomitant NSAID use.

∫, was adjusted for age, sex, obesity, ever smoking, definite radiographic sacroiliitis, follow-up year, TNFi naïve, baseline CRP and concomitant NSAID use.

**Supplementary table S2.** Effect of tapering DQ on maintaining ASDAS-ID in subsequent one-year intervals in the subgroup of patients who showed ASDAS-low disease activity (1.3 ≤ ASDAS-CRP < 2.1) at 1-year follow-up (n = 254)

|  | Number (%) of 1-year intervals maintained the ASDAS-ID | Univariable model  OR (95% CI)  (n = 254) | Longitudinal model†  OR (95% CI)  (n = 254) |
| --- | --- | --- | --- |
| Group according to the interval DQ |  |  |  |
| Control group (DQ=100) | 72 (38.5) | Reference | Reference |
| Tapering group (DQ<100)* | 23 (27.7) | 0.90 (0.53–1.52) | 0.53 (0.28–0.98) |
| QIC of the model |  | 499.892 | 371.438 |

ASDAS, Ankylosing Spondylitis Disease Activity Score; CI, confidence interval; DQ, dose quotient; OR, odds ratio; QIC, Quasi-likelihood under the Independence model Criterion.

*, Stratification of the group based on DQ=50 was not available due to the small number of heavy-tapering group (n=11).

†, The model was adjusted for ASDASt-1 and concomitant NSAID. No baseline clinical factors showed a relevant association with the outcome in the univariable analysis.

**Supplementary table S3** Multivariable longitudinal model where all clinically relevant factors were included as covariates

|  | Univariable model  OR (95% CI)  (n = 757–776) | Multivariable model*  OR (95% CI)  (n = 767) |
| --- | --- | --- |
| Baseline variable |  |  |
| Age, 10 years | 0.87 (0.79–0.97) | 0.94 (0.84–1.04) |
| Female sex | 0.98 (0.73–1.30) | 0.70 (0.50–0.99) |
| Disease duration, 10 years | 0.81 (0.66–1.002) | 0.75 (0.60–0.95) |
| Obesity (BMI ≥ 25) | 0.71 (0.54–0.93) | 0.75 (0.57–0.99) |
| Ever-smokers | 0.73 (0.57–0.93) | 0.75 (0.57–0.99) |
| Positive HLA-B27 (vs. negative) | 1.63 (1.03–2.56) | 1.64 (1.03–2.61) |
| AS (vs. nr-axSpA) | 0.66 (0.45–0.96) | 0.71 (0.48–1.05) |
| TNFi naïve | 0.98 (0.73–1.31) | 0.99 (0.72–1.37) |
| Baseline ASDAS-CRP, unit | 0.77 (0.69–0.87) | 0.86 (0.75–0.99) |
| Longitudinal variable |  |  |
| Follow-up time (vs. interval in the one-year follow-up) | Reference | Reference |
| Interval in the two-year follow-up | 0.98 (0.82–1.17) | 0.60 (0.45–0.81) |
| Interval in the three-year follow-up | 1.06 (0.83–1.36) | 0.63 (0.44–0.90) |
| ASDAS-CRPt-1, unit | 0.92 (0.86–0.98) | 0.81 (0.69–0.94) |
| Concomitant NSAID use during the interval | 0.44 (0.35–0.56 | 0.42 (0.33–0.55) |
| Concomitant sulfasalazine use during the interval | 0.31 (0.11–0.94) | 0.28 (0.08–0.90) |
| Concomitant MTX use during the interval | 1.37 (0.76–2.44) | 1.62 (0.81–322) |
| Group according to the interval DQ |  |  |
| Control group (DQ = 100) | Reference | Reference |
| Mild-tapering group (50 ≤ DQ < 100) | 1.21 (0.98–1.48) | 0.90 (0.57–1.44) |
| Heavy-tapering group (DQ < 50) | 0.44 (0.22–0.88) | 0.26 (0.08–0.86) |
| QIC of the model |  | 1970.124 |

AS, ankylosing spondylitis; ASDAS, Ankylosing Spondylitis Disease Activity Score; BMI, body mass index; CI, confidence interval; CRP, C-reactive protein; DQ, dose quotient; HLA, human leukocyte antigen; LDA, low disease activity; MTX, methotrexate; nr-axSpA, non-radiographic axial spondyloarthritis; NSAID, non-steroidal anti-inflammatory drug; OR, odds ratio; QIC, quasi-likelihood under the Independence model Criterion; TNFi, tumor-necrosis factor inhibitor.

*, The model included all variables irrespective of the statistical significance in the univariable model.

**Supplementary table S4.** Effect of tapered DQ on the achievement of consecutive ASDAS-ID in the subgroup of patients who completed 3-year follow-up

|  | Univariable model  OR (95% CI)  (n = 757–776) | Baseline model*  OR (95% CI)  (n = 748) | Longitudinal model⁋  OR (95% CI)  (n = 748) |
| --- | --- | --- | --- |
| Baseline variable |  |  |  |
| Age, 10 years | 0.96 (0.81–1.13) | ‡ | ‡ |
| Female sex | 1.47 (0.90–2.41)/ | 1.11 (0.60–2.05) | 1.00 (0.53–2.00) |
| Disease duration, 10 years | 0.85 (0.61–1.19) | ‡ | ‡ |
| Obesity (BMI≥25) | 0.80 (0.48–1.32) | ‡ | ‡ |
| Ever-smokers | 0.59 (0.39–0.90)/ | 0.63 (0.39–1.02) | 0.63 (0.39–1.01) |
| Positive HLA-B27 (vs. negative) | 1.18 (0.59–2.36) | ‡ | ‡ |
| Definite radiographic sacroiliitis | 0.69 (0.37–1.29) | ‡ | ‡ |
| TNFi naïve | 0.81 (0.50–1.31) | ‡ | ‡ |
| Baseline ASDAS-CRP, unit | 0.66 (0.54–0.81)/ | 0.67 (0.55–0.83) | 0.72 (0.58–0.90) |
| Longitudinal variable |  |  |  |
| Follow-up time (vs. interval in the 1-year follow-up) | Reference | † | ‡ |
| Interval in the 2-year follow-up | 0.93 (0.70–1.23) | † | ‡ |
| Interval in the 3-year follow-up | 1.10 (0.83–1.45) | † | ‡ |
| ASDAS-CRP t-1, unit | 0.87 (0.78–0.98) | † | 0.93 (0.79–1.08) |
| Concomitant NSAID use during the interval | 0.42 (0.29–0.61) | † | 0.47 (0.31–0.70) |
| Concomitant MTX use during the interval | 1.05 (0.40–2.77) | † | ‡ |
| Group according to the interval DQ |  |  |  |
| Control group (DQ=100) | Reference | Reference | Reference |
| Mild-tapering group (50≤DQ<100) | 1.01 (0.76–1.35) | 0.95 (0.70–1.28) | 0.86 (0.42–1.78) |
| Heavy-tapering group (DQ<50) | 0.83 (0.33–2.06) | 0.80 (0.32–2.01) | 0.35 (0.08–1.47) |
| QIC of the model | 924.564 | 888.392 | 857.960 |

BASDAI, Bath Ankylosing Spondylitis Activity Index; BMI, body mass index; CI, confidence interval; CRP, C-reactive protein; DQ, dose quotient; HLA, human leukocyte antigen; MTX, methotrexate; NSAID, Non-steroidal anti-inflammatory drug; OR, odds ratio; QIC, Quasi-likelihood under the Independence model Criterion; TNFi, tumour-necrosis factor inhibitor.

*, The model was adjusted for baseline clinical factors showing a relevant association (P < 0.2) with the outcome in the univariable model.

†, Does not included in the model.

‡, Does not included in the model because its association with the outcome was not relevant (P ≥ 0.2)

⁋, The model was adjusted for covariates in the baseline model and longitudinal factors with a relevant association (P < 0.2) with the outcome in the univariable model.
